# Supplementary material for: Peroxidase-like activity of MoS2 nanoflakes with different modifications and their application for H2O2 and glucose detection
Source: Royal Society of Chemistry journal article supplement (doi:10.1039/c7tb02676e), 2017-12-18
Supplement: c7tb02676e1.pdf [file c7tb02676e1.pdf]

Electronic Supplementary Information

**Peroxidase-Like Activity of MoS<sub>2</sub> Nanoflakes with Different  
Modifications and Their Application for H<sub>2</sub>O<sub>2</sub> and Glucose Detection**

Jie Yu <sup>a,b</sup>, Dongqing Ma<sup>b</sup>, Linqiang Mei<sup>b</sup>, Qin Gao<sup>b</sup>, Wenyan Yin<sup>b,\*</sup>, Xiao  
Zhang<sup>b</sup>, Liang Yan<sup>b</sup>, Zhanjun Gu<sup>b,\*</sup>, Xiaoyan Ma<sup>a,\*</sup>, and Yuliang Zhao<sup>b</sup>

<sup>a</sup>Key Laboratory of Polymer Science and Technology, School of Science,  
Northwestern Polytechnical University, Xi'an, Shaanxi, 710129, P. R.  
China

<sup>b</sup>Key Laboratory for Biomedical Effects of Nanomaterials and  
Nanosafety, Institute of High Energy Physics, Chinese Academy of  
Sciences, Beijing 100049, P. R. China

\*Corresponding Authors E-mail: yinwy@ihep.ac.cn, zjgu@ihep.ac.cn,  
m\_xiao\_yana@nwpu.edu.cn,

**The descriptions about interactions between the MoS<sub>2</sub> and functionalization molecules:**

There are three types of interaction between MoS<sub>2</sub> and functionalization molecules, including electrostatic interaction (PEI-MoS<sub>2</sub>), hydrophilic/hydrophobic interaction (PVP-MoS<sub>2</sub>, or PAA-MoS<sub>2</sub>), and covalent interaction (Cys-MoS<sub>2</sub>). Briefly, (1) for MoS<sub>2</sub>-Cys, the S vacancy could exist in 2H and 1T phases of MoS<sub>2</sub>, which are all layered structure except for the different atomic arrangement of S in their crystal phase.<sup>1</sup> Therefore, the S vacancy provided an active site to form covalent bond between Cys and MoS<sub>2</sub> via thiol group;<sup>2</sup> (2) For MoS<sub>2</sub>-PEI, due to the negatively charged MoS<sub>2</sub> with 1T and 2H phase, the PEI molecule with positive charge can adsorb onto the surface of MoS<sub>2</sub> NFs via electrostatic interaction; (3) For PVP- or PAA-MoS<sub>2</sub>, the hydrophobic alkyl chains in PVP and PAA molecule provided hydrophilic/hydrophobic interaction between MoS<sub>2</sub> and PAA/PVP, thus the mixed phase of MoS<sub>2</sub> were involved and hydrophobic interaction may play a key role in PAA- and PVP- MoS<sub>2</sub> NFs.

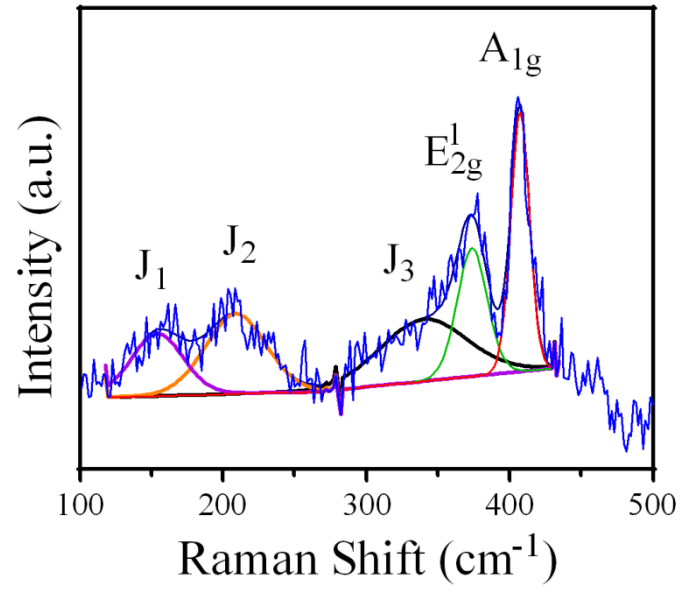

**Fig. S1.** Raman spectrum of MoS<sub>2</sub> NFs. The peaks of J<sub>1</sub>, J<sub>2</sub>, and J<sub>3</sub> were attributed to the 1T phase of MoS<sub>2</sub>.

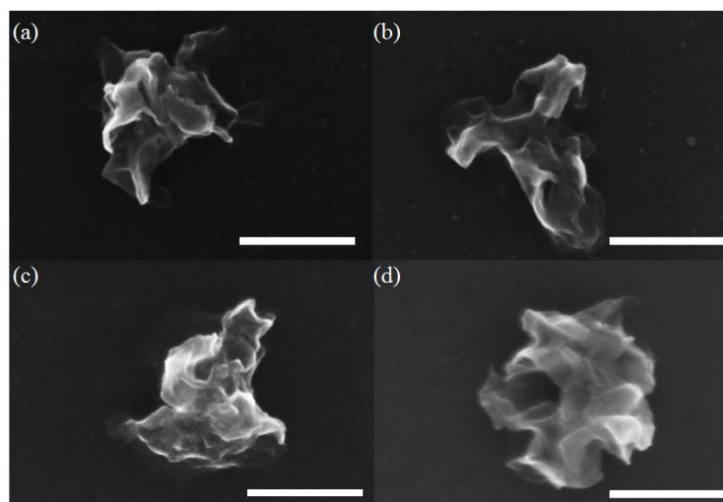

**Fig. S2.** FE-SEM images of (a) PVP-MoS<sub>2</sub>, (b) PEI-MoS<sub>2</sub>, (c) PAA-MoS<sub>2</sub>, and (d) Cys-MoS<sub>2</sub>. Scale bar: 200 nm.

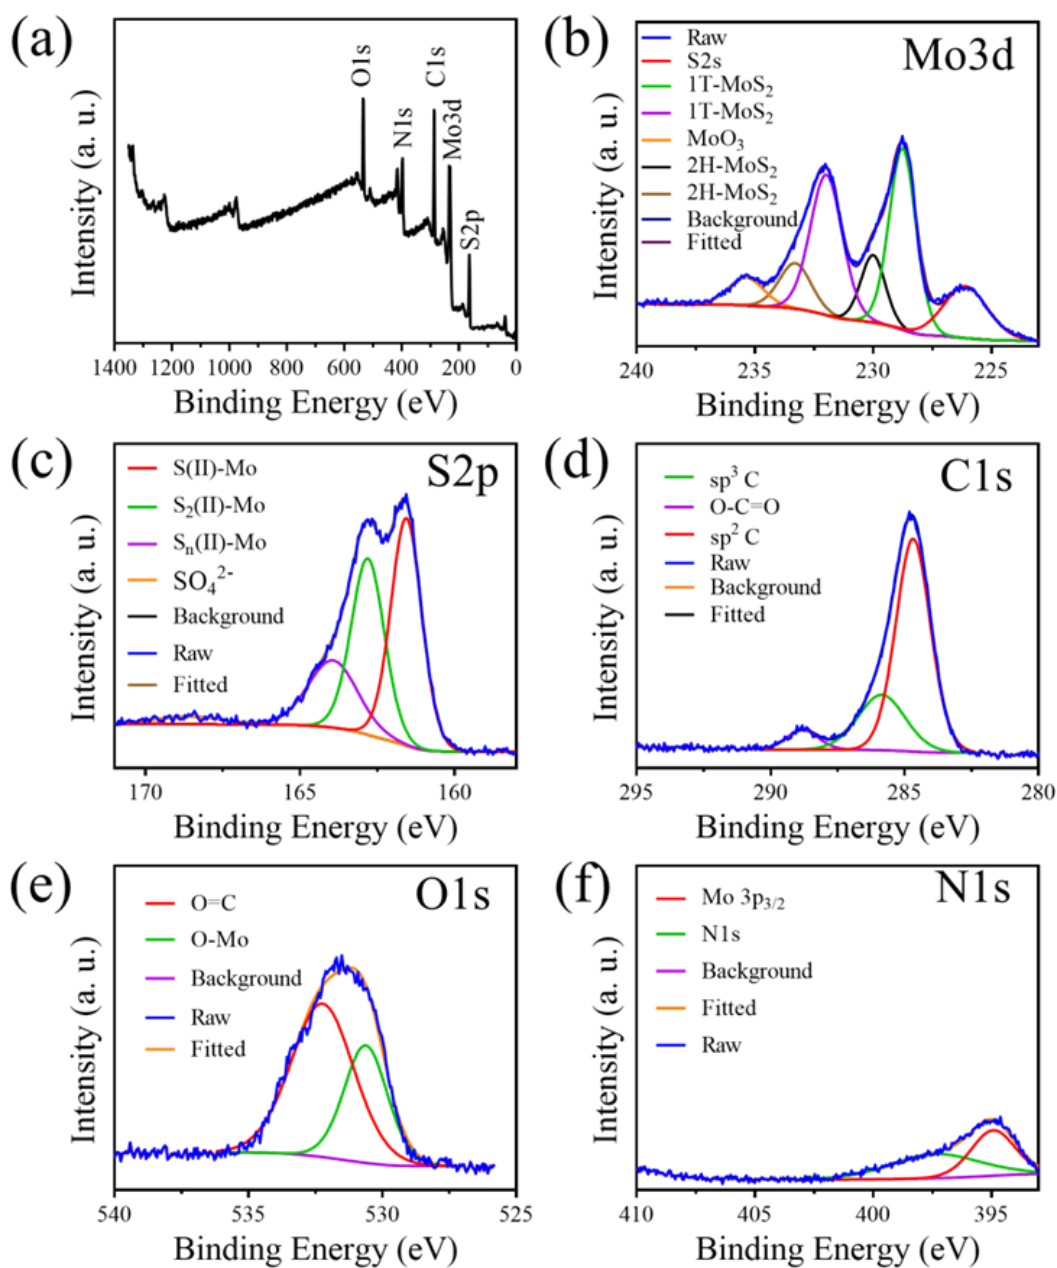

**Fig. S3.** XPS spectra of MoS<sub>2</sub> NFs. (a) Survey plot, (b-f) high-resolution XPS spectra: (b) Mo3d, (c) S2p, (d) C1s, (e) O1s, and (f) N1s.

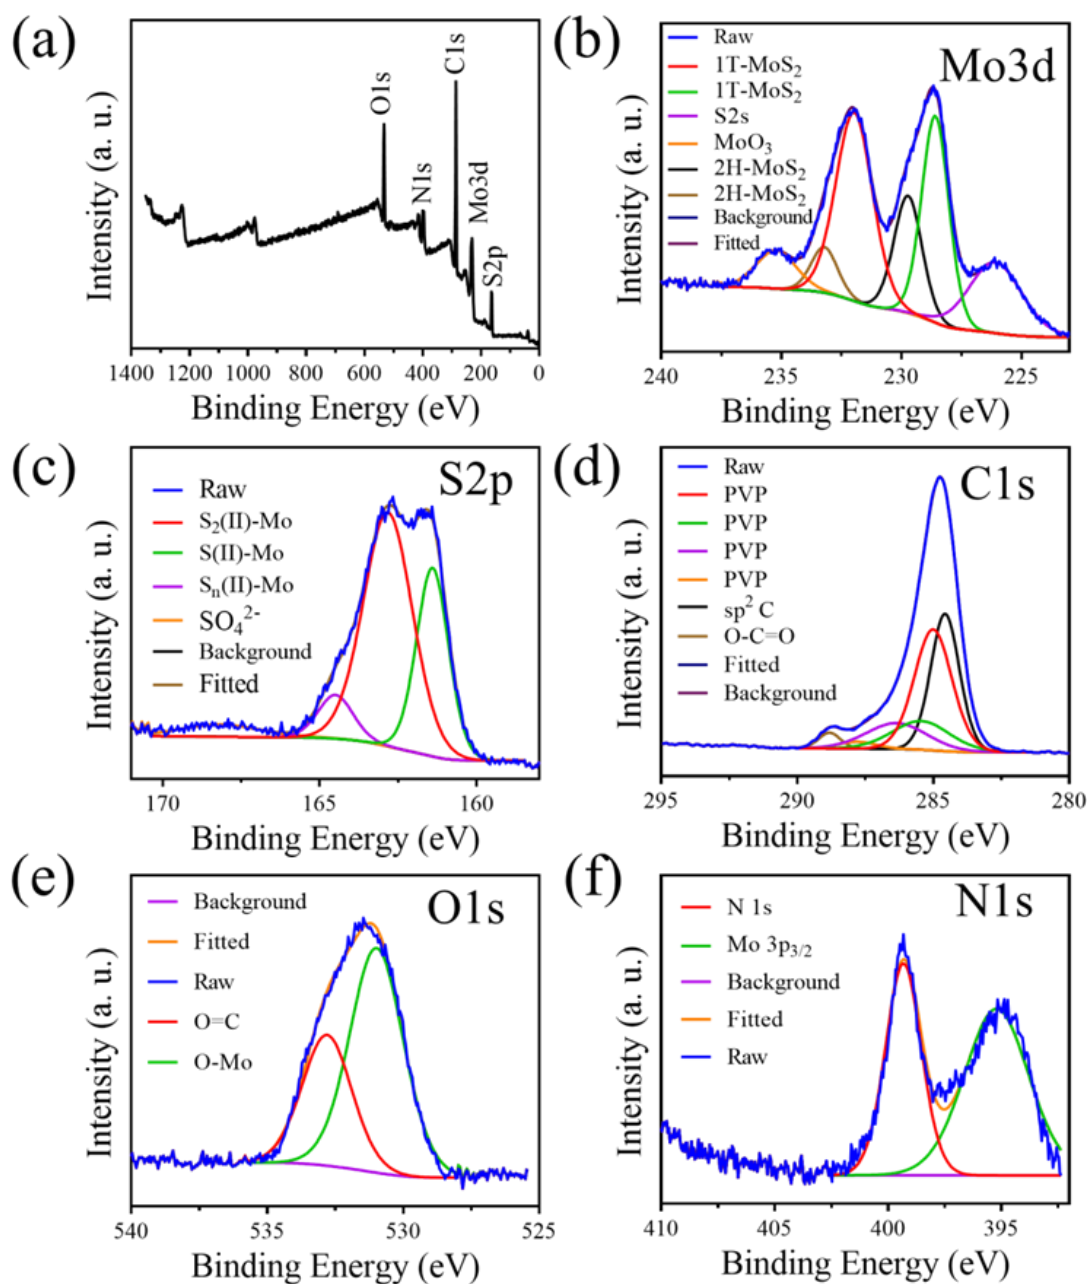

**Fig. S4.** XPS spectra of PVP-MoS<sub>2</sub> NFs. (a) Survey plot, (b-f) high-resolution XPS spectra: (b) Mo3d, (c) S2p, (d) C1s, (e) O1s, and (f) N1s.

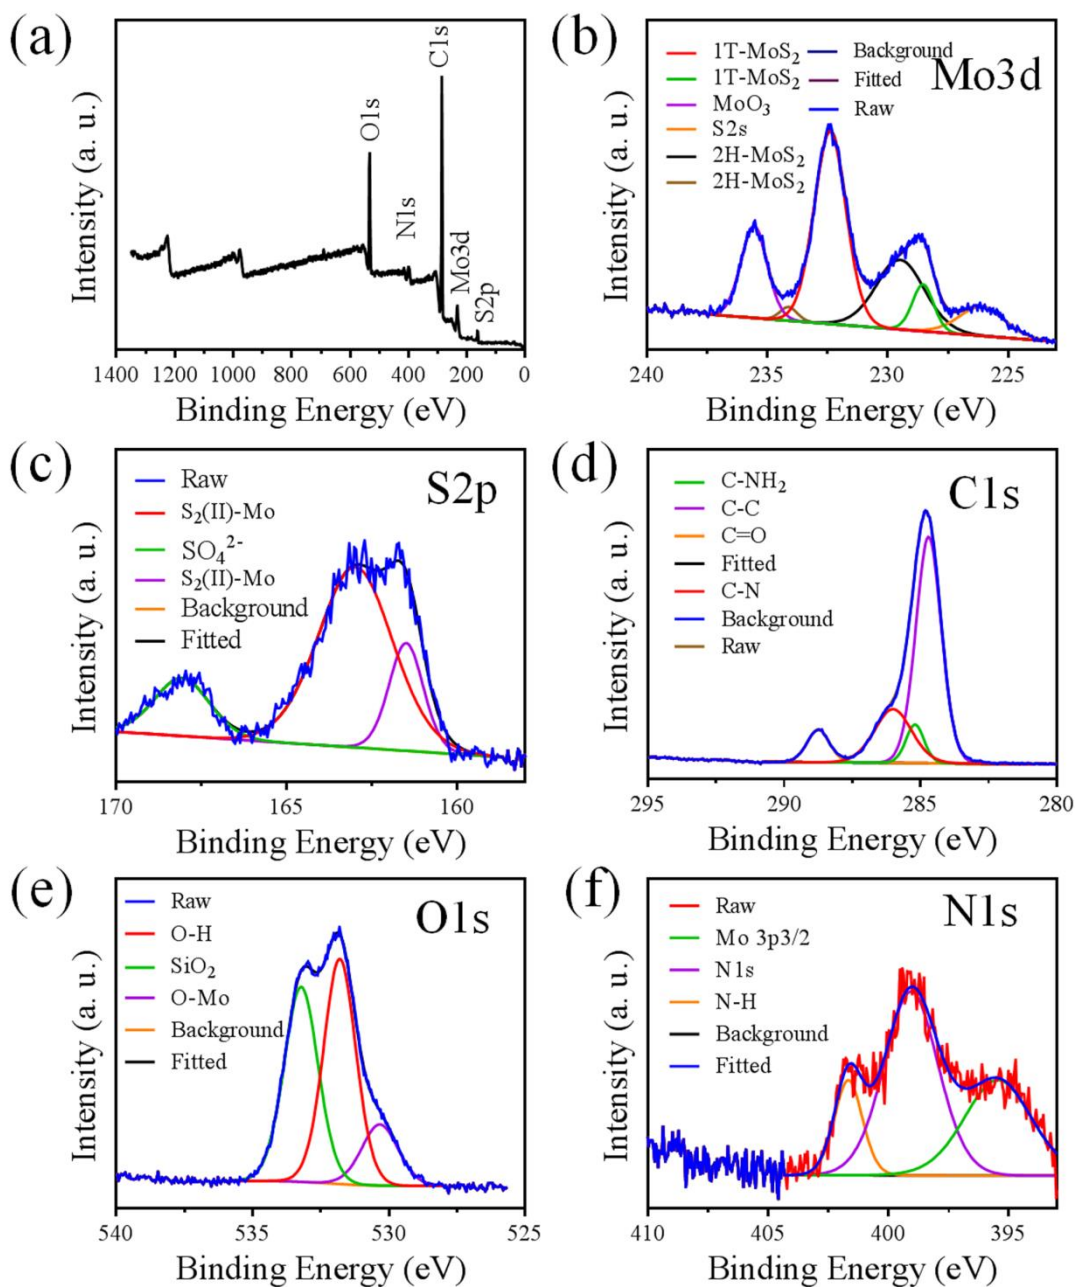

**Fig. S5.** XPS spectra of PEI-MoS<sub>2</sub> NFs. (a) Survey plot, (b-f) high-resolution XPS spectra: (b) Mo3d, (c) S2p, (d) C1s, (e) O1s, and (f) N1s.

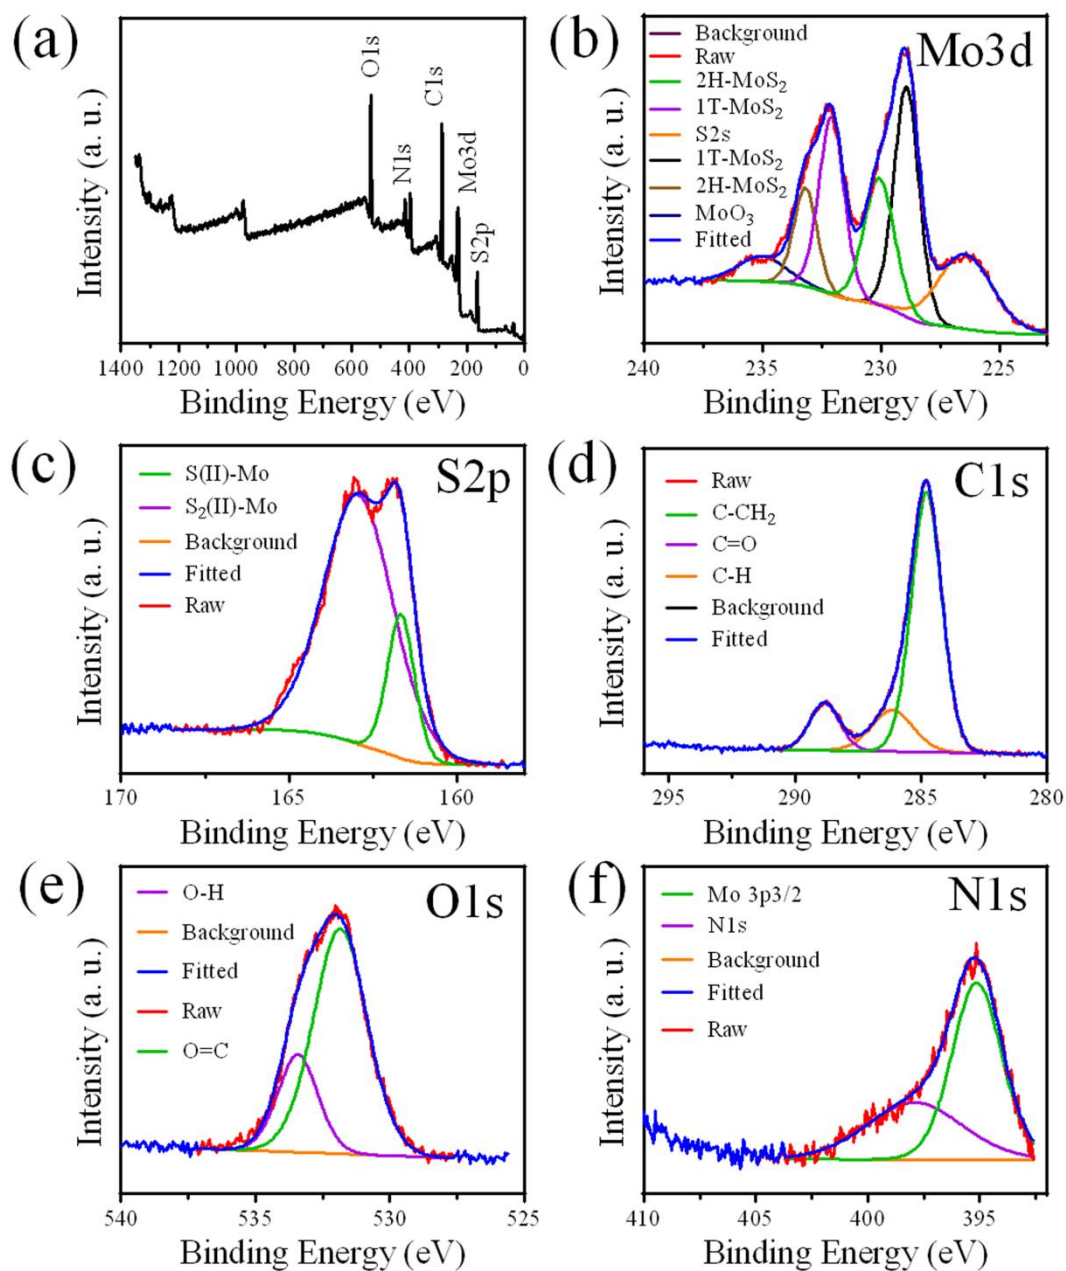

**Fig. S6.** XPS spectra of PAA-MoS<sub>2</sub> NFs. (a) Survey plot, (b-f) high-resolution XPS spectra: (b) Mo3d, (c) S2p, (d) C1s, (e) O1s, and (f) N1s.



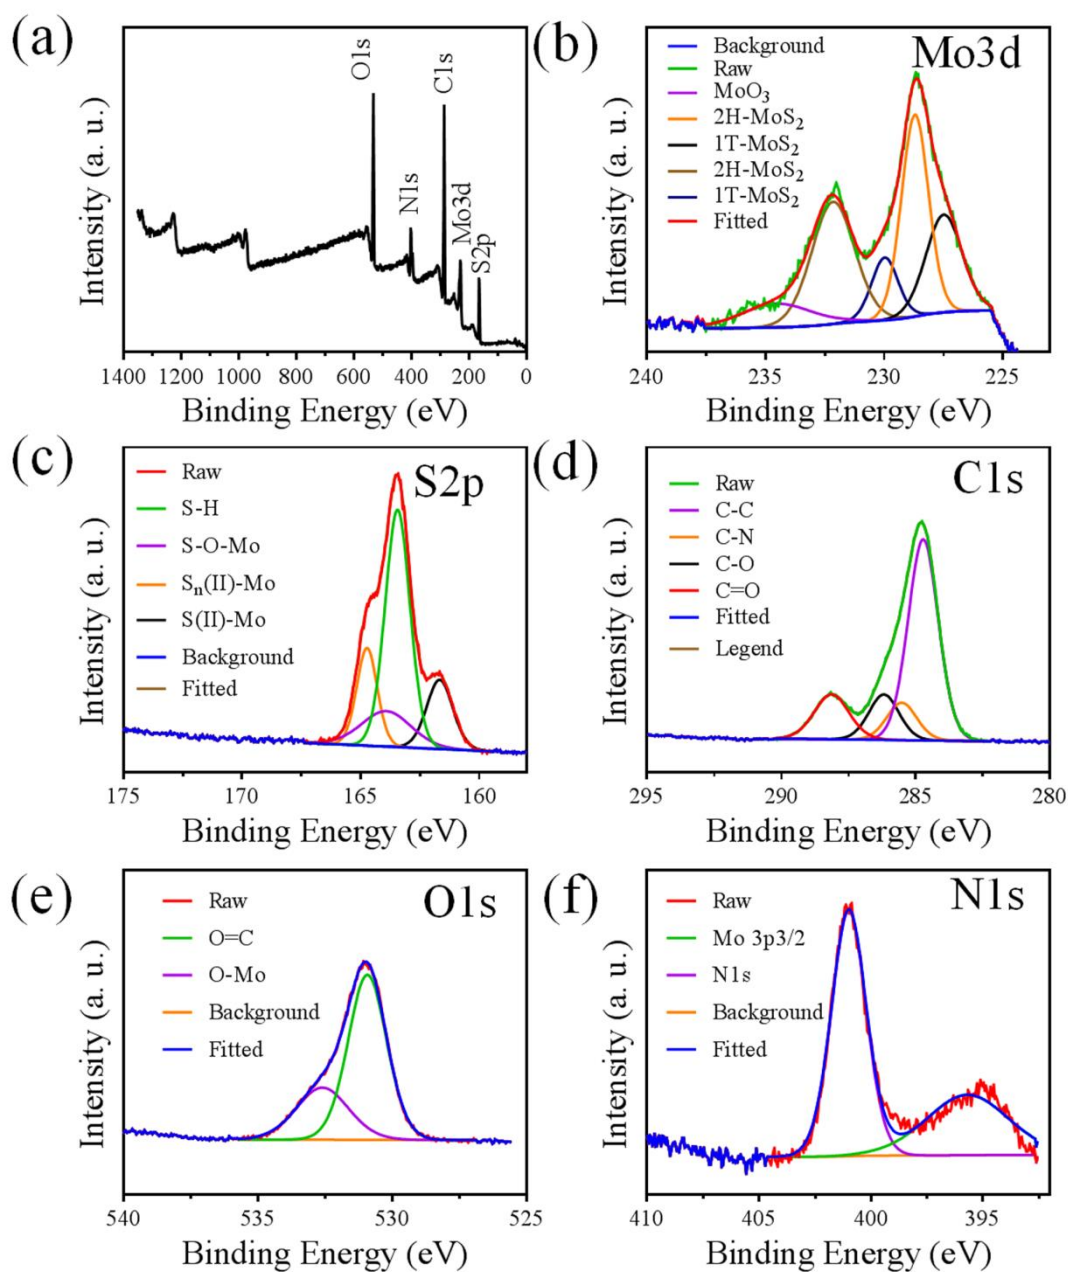

**Fig. S7.** XPS spectra of Cys-MoS<sub>2</sub> NFs. (a) Survey plot, (b-f) high-resolution XPS spectra: (b) Mo3d, (c) S2p, (d) C1s, (e) O1s, and (f) N1s.

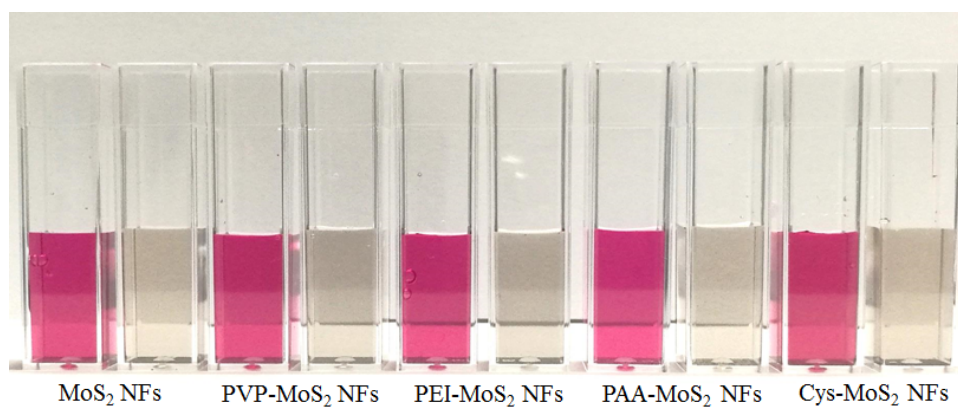

**Fig. S8.** Stability tests of MoS<sub>2</sub> NFs and modified MoS<sub>2</sub> NFs in DMEM (left) and water (right) solutions. The concentration of each MoS<sub>2</sub> NFs solution was 100  $\mu\text{g mL}^{-1}$ .

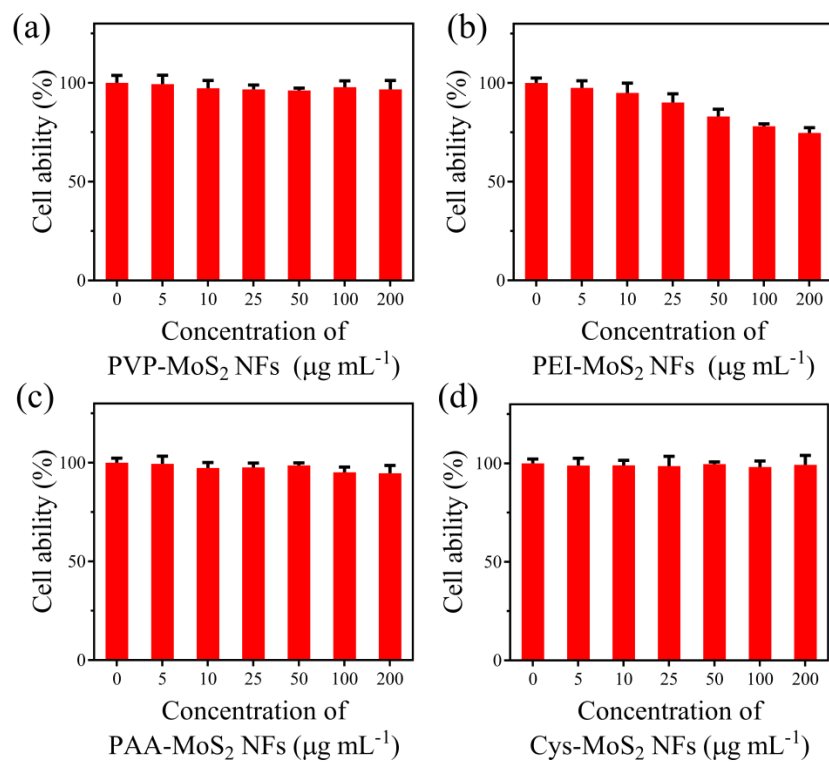

**Fig. S9.** Cell viabilities of (a) PVP-MoS<sub>2</sub> NFs, (b) PEI-MoS<sub>2</sub>, (c) PAA-MoS<sub>2</sub> NFs, and (d) Cys-MoS<sub>2</sub> NFs after incubation with HUVEC cells for 24 h.

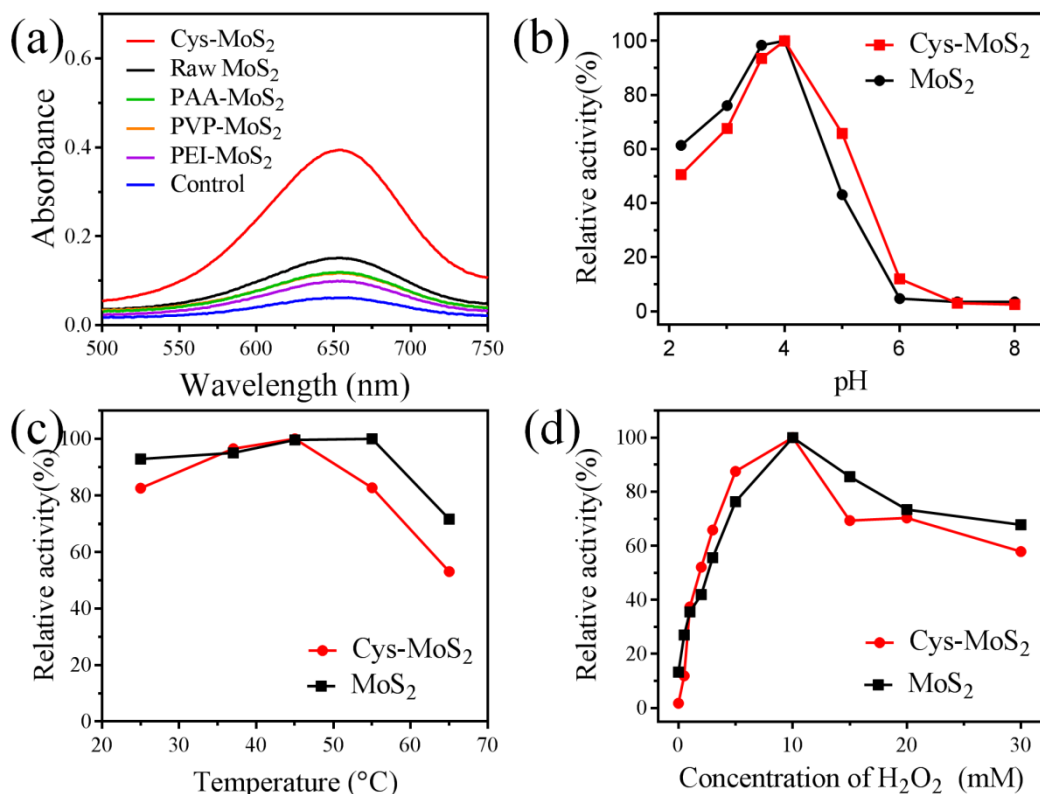

**Fig. S10.** Peroxidase-like catalytic activity of MoS<sub>2</sub> NFs toward TMB with or without modifications. (a) UV-Vis spectra of raw MoS<sub>2</sub> NFs and modified MoS<sub>2</sub> NF. (b) pH- and (c) temperature-dependent activities of MoS<sub>2</sub> NFs and Cys-MoS<sub>2</sub> NFs. (d) H<sub>2</sub>O<sub>2</sub> concentration-dependent peroxidase activity of MoS<sub>2</sub> NFs and Cys-MoS<sub>2</sub> NFs. The concentrations of NFs and TMB were respectively 33  $\mu\text{g mL}^{-1}$  and 1 mM for all the experiment. The concentration of H<sub>2</sub>O<sub>2</sub> for absorbance, pH and temperature measurements was 10 mmol L<sup>-1</sup>. The solution containing 1 mM of TMB and 10 mM of H<sub>2</sub>O<sub>2</sub> was used as control.

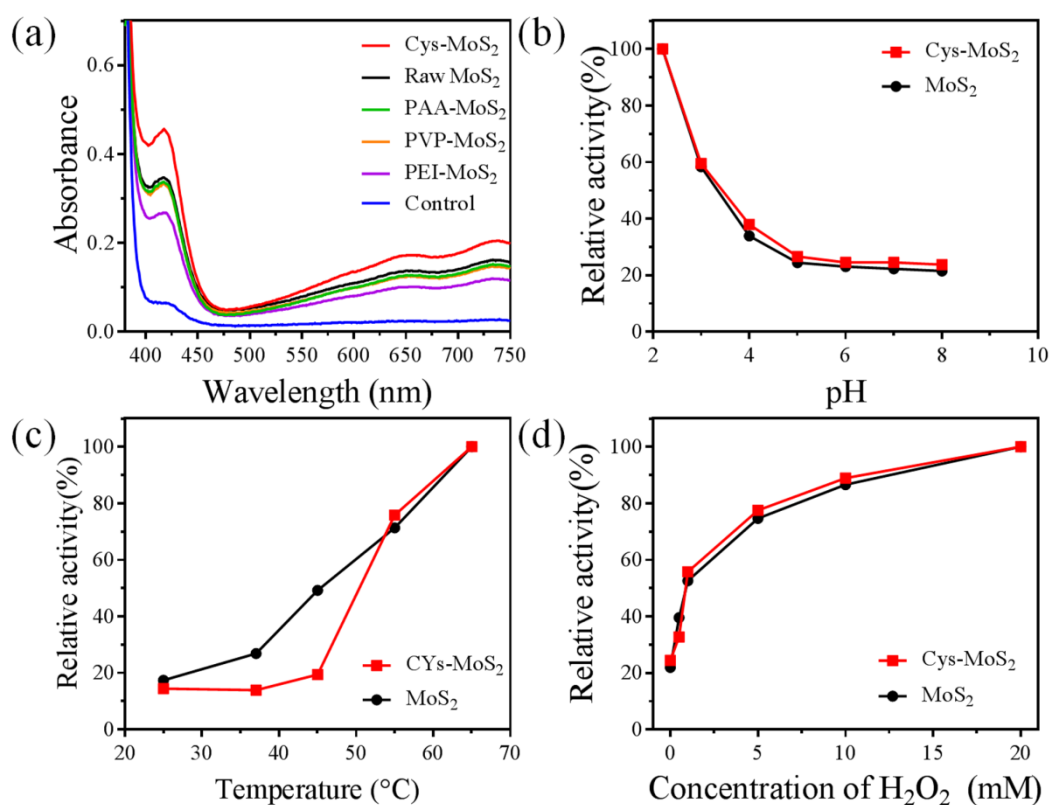

**Fig. S11.** Peroxidase-like catalytic activity of MoS<sub>2</sub> NFs toward ABTS with or without modifications. (a) UV-Vis spectra of raw MoS<sub>2</sub> NFs and modified MoS<sub>2</sub> NFs. (b) pH- and (c) temperature-dependent activities of MoS<sub>2</sub> NFs and Cys-MoS<sub>2</sub> NFs. (d) H<sub>2</sub>O<sub>2</sub> concentration-dependent peroxidase-like catalytic activity of MoS<sub>2</sub> NFs and Cys-MoS<sub>2</sub> NFs. The concentrations of NFs and ABTS were respectively 33  $\mu\text{g mL}^{-1}$  and 1 mM for all the experiment. The concentration of H<sub>2</sub>O<sub>2</sub> for absorbance, pH and temperature measurements was 10 mM. The solution containing 1 mM of ABTS and 10 mM of H<sub>2</sub>O<sub>2</sub> was used as control.

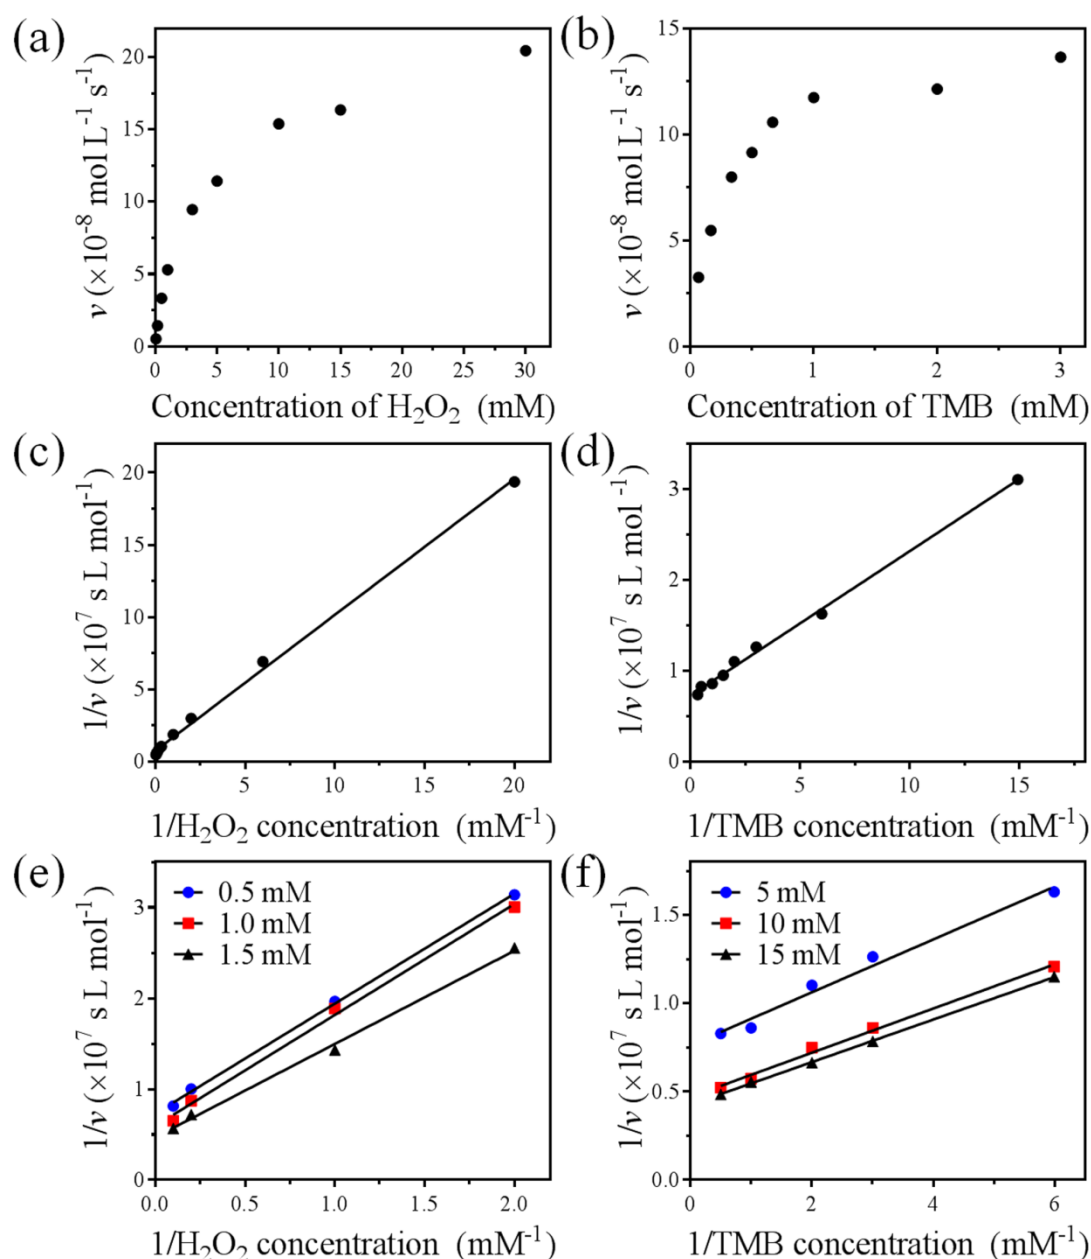

**Fig. S12.** Steady-state kinetic assay and catalytic mechanism of raw MoS<sub>2</sub> NFs. The velocity was determined by measuring the absorbance of oxidized TMB under different (a) H<sub>2</sub>O<sub>2</sub> and (b) TMB concentrations. (c-d) Corresponding double-reciprocal plots of MoS<sub>2</sub> NFs at a fixed concentration of one substrate *versus* varying the concentration of another (c) H<sub>2</sub>O<sub>2</sub> or (d) TMB. (e-f) Lineweaver-Burk plots of raw MoS<sub>2</sub> NFs at each concentration of one substrate *versus* varying concentration of another substrate.

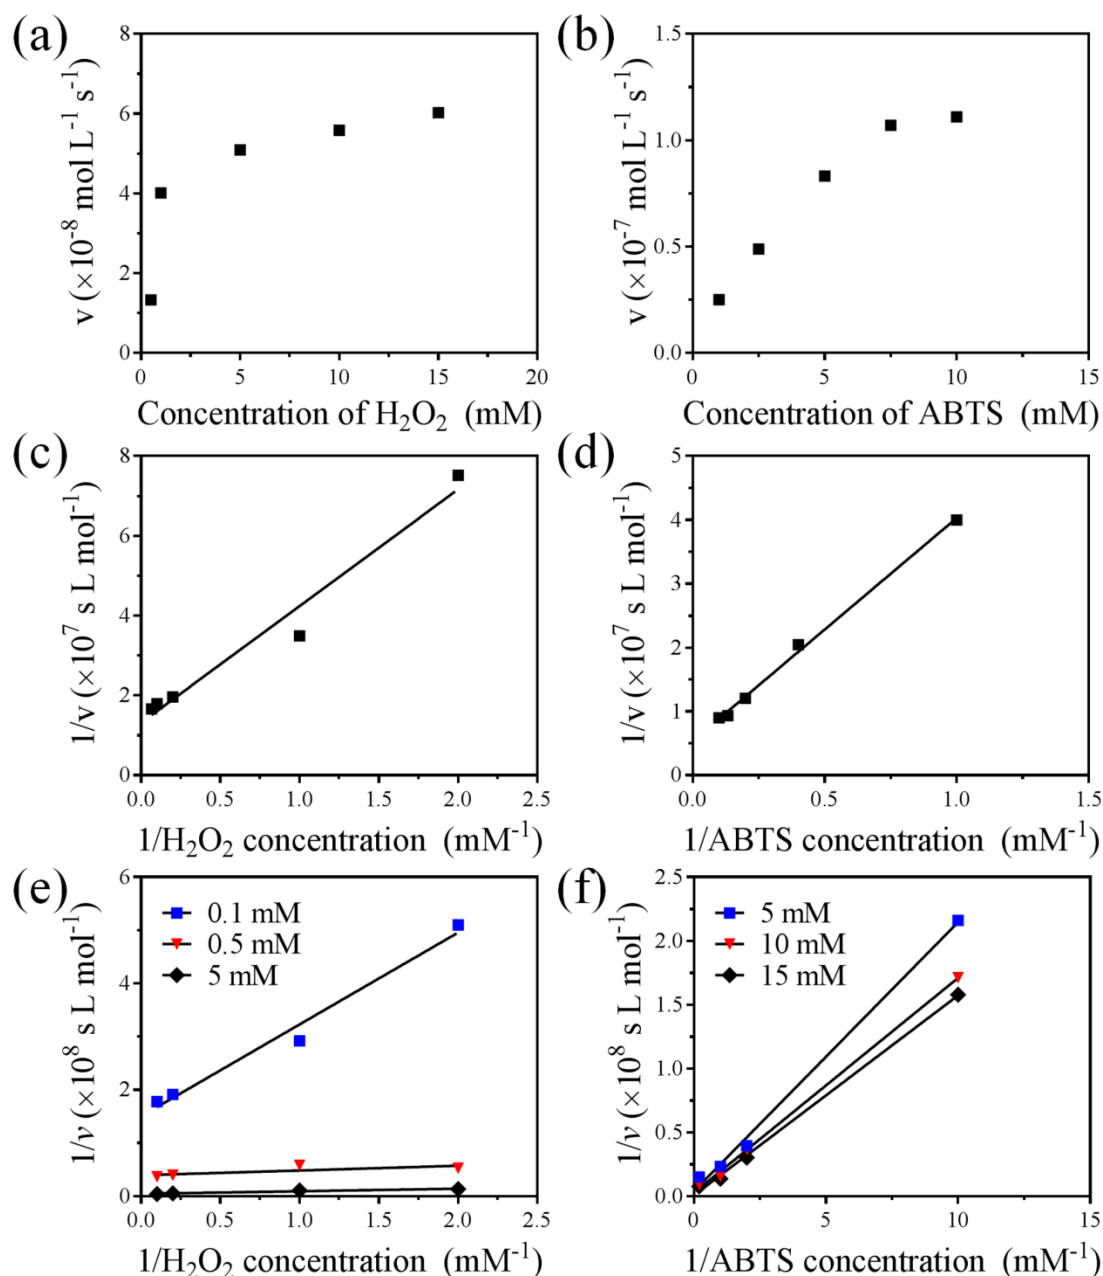

**Fig. S13.** Steady-state kinetic assay and catalytic mechanism of raw MoS<sub>2</sub> NFs. The velocity was determined by measuring the absorbance of oxidized ABTS under different (a) H<sub>2</sub>O<sub>2</sub> and (b) ABTS concentrations. (c-d) Corresponding double-reciprocal plots of MoS<sub>2</sub> NFs at a fixed concentration of one substrate *versus* varying the concentration of (c) H<sub>2</sub>O<sub>2</sub> or (d) ABTS. (e-f) Lineweaver-Burk plots of MoS<sub>2</sub> NFs at each concentration of one substrate *versus* varying concentration of another substrate.

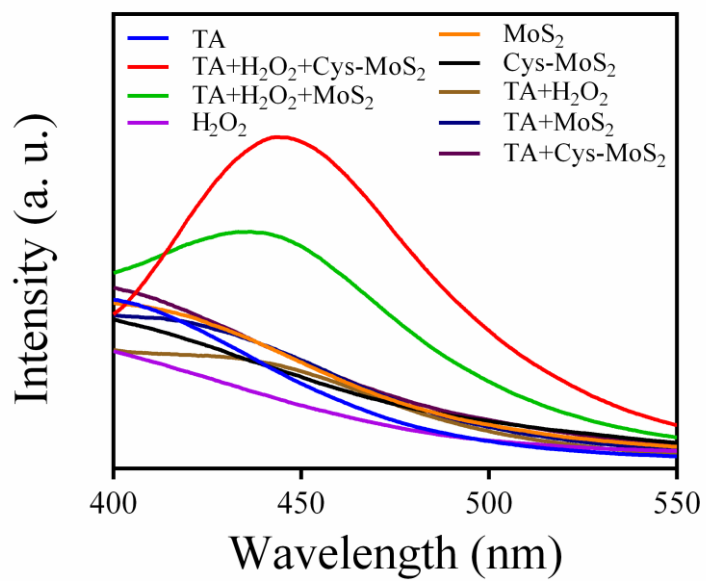

**Fig. S14.** TA as fluorescent probe to test the formation of  $\cdot\text{OH}$  at  $\text{pH} = 4.0$ . Reaction conditions:  $1.0 \mu\text{g mL}^{-1}$  of Cys-MoS<sub>2</sub> and MoS<sub>2</sub>,  $100 \mu\text{M}$  of H<sub>2</sub>O<sub>2</sub>,  $0.5 \text{ mM}$  of TA, and  $0.1 \text{ M}$  acetate buffer ( $\text{pH} = 4.0$ ) at  $25^\circ\text{C}$  for  $12 \text{ h}$ .



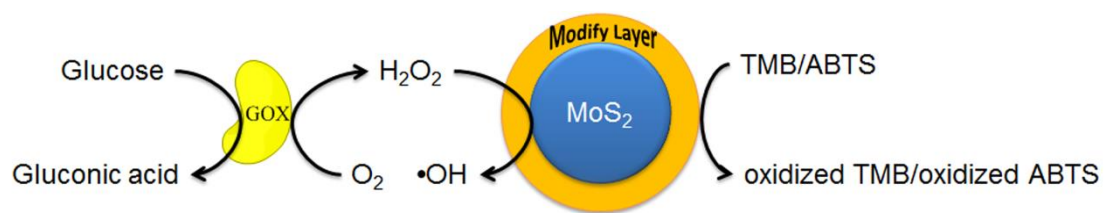

**Scheme S1.** Illustration of MoS<sub>2</sub> NFs and Cys-MoS<sub>2</sub> NFs used for H<sub>2</sub>O<sub>2</sub> and glucose detection.

**Table S1.** Comparisons of various methods for glucose detection.

| Materials                                      | Method           | Linear Range (mmol L <sup>-1</sup> ) | Ref.      |
|------------------------------------------------|------------------|--------------------------------------|-----------|
| Hollow Pt/MWCNTs                               | electrochemistry | 0.0012–8.4                           | 3         |
| PVP-Ag nanowires                               | electrochemistry | 2–20                                 | 4         |
| Cu <sub>2</sub> O nanocubes/graphene           | electrochemistry | 0.3–3.3                              | 5         |
| Au nanoclusters                                | fluorimetry      | 0.01- 0.5                            | 6         |
| B-doped carbon quantum dot                     | fluorimetry      | 0.008-0.08                           | 7         |
| QDs-ConA-β-CDs-AuNP                            | fluorimetry      | 0.0001-0.05                          | 8         |
| Fe-Phen-CFs                                    | fluorimetry      | 0.0005-0.2                           | 9         |
| Graphene oxide                                 | colorimetry      | 0.001-0.02                           | 10        |
| Carbon nanodots                                | colorimetry      | 0.001-0.5                            | 11        |
| ZnFe <sub>2</sub> O <sub>4</sub> nanoparticles | colorimetry      | 0.0012-0.019                         | 12        |
| SDS-MoS <sub>2</sub>                           | colorimetry      | 0.002-0.1                            | 13        |
| PVP-MoS <sub>2</sub> nanoparticles             | colorimetry      | 1-10                                 | 14        |
| CoOOH nanoflakes                               | colorimetry      | 0.0053–0.5                           | 15        |
| Porphyrin-CeO <sub>2</sub>                     | colorimetry      | 0.019-0.15                           | 16        |
| MoS <sub>2</sub> /graphene oxide               | colorimetry      | 0.001-0.05                           | 17        |
| MoS <sub>2</sub> NFs                           | colorimetry      | 0.1-1                                | This work |
| Cys-MoS <sub>2</sub> NFs                       | colorimetry      | 0.05-1                               | This work |

## References

1. D. Voiry, A. Mohite and M. Chhowalla, *Chem. Soc. Rev.*, 2015, **44**, 2702-2712.
2. S. S. Chou, M. De, J. Kim, S. Byun, C. Dykstra, J. Yu, J. Huang and V. P. Dravid, *J. Am. Chem. Soc.*, 2013, **135**, 4584-4587.
3. Y. Wang, R. Yuan, Y. Chaia, W. Li, Y. Zhuo, Y. Yuan and J. Li, *J. Mol. Catal. B: Enzym.*, 2011, **71**, 146-151.
4. X. Yang, J. Bai, Y. Wang, X. Jiang and X. He, *Analyst*, 2012, **137**, 4362-4367.
5. M. Liu, R. Liu and W. Chen, *Biosens. Bioelectron.*, 2013, **45**, 206-212.
6. L. Jin, L. Shang, S. Guo, Y. Fang, D. Wen, L. Wang, J. Yin and S. Dong, *Biosens. Bioelectron.*, 2011, **26**, 1965-1969.
7. X. Shan, L. Chai, J. Ma, Z. Qian, J. Chen and H. Feng, *Analyst*, 2014, **139**, 2322-2325.
8. B. Tang, L. Cao, K. Xu, L. Zhuo, J. Ge, Q. Li and L. Yu, *Chem. - Eur. J.*, 2008, **14**, 3637-3644.
9. X. Zhu, J. Xiang, J. Li, C. Feng, P. Liu and B. Xiang, *J. Colloid Interface Sci.*, 2018, **511**, 209-214.
10. Y. Song, K. Qu, C. Zhao, J. Ren and X. Qu, *Adv. Mater.*, 2010, **22**, 2206-2210.
11. W. Shi, Q. Wang, Y. Long, Z. Cheng, S. Chen, H. Zheng and Y. Huang, *Chem. Commun.*, 2011, **47**, 6695-6697.
12. L. Su, J. Feng, X. Zhou, C. Ren, H. Li and X. Chen, *Anal. Chem.*, 2012, **84**, 5753-5758.

13. K. Zhao, W. Gu, S. Zheng, C. Zhang and Y. Xian, *Talanta*, 2015, **141**, 47-52.
14. J. Yu, X. Y. Ma, W. Y. Yin and Z. J. Gu, *RSC Adv.*, 2016, **6**, 81174-81183.
15. Y. Wang, X. Shen and F. Chen, *Journal of Molecular Catalysis A: Chemical*, 2014, **381**, 38-45.
16. J. R. Lince, A. M. Pluntze, S. A. Jackson, G. Radhakrishnan and P. M. Adams, *Tribology Letters*, 2014, **53**, 543-554.
17. J. Cao, X. Zhang, Y. Zhang, J. Zhou, Y. Chen and X. Liu, *PLOS ONE*, 2016, DOI: 10.1371/journal.pone.0161374.
